# Supplementary material for: Mental Health Consequences from COVID-19 Pandemic and Strategies for Community Level Recovery
Source: Research Square preprint supplement (doi:10.21203/rs.3.rs-1203356/v2), 2022-01-17
Supplement: Supplementary file 1 [file 3bafae2c43c0ddee1cf979ea.docx]

1. World Health Organisation (WHO). Rolling updates on coronavirus disease (COVID-19). Available from:https://www.who.int/emergencies/diseases/novel-coronavirus-2019/events-as-they-happen. [Last accessed on 2020 Nov 07].
2. Euro surveillance editorial team. Note from the editors: World Health Organisation declares novel coronavirus (2019-nCoV) sixth public health emergency of international concern. Euro Surveillance 2020; 25(5):pii-20013e. doi: 10.2807/1560-7917.ES.2020.25.5.200131e.
3. Markson, S. What really happened in Wuhan. Sydney (Australia): Harper Collins Publishers; 2021
4. Tsai PH, Lai WY, Lin YY, Luo YH, Lin YT, Chen HK, et.al. Clinical manifestation and disease progression in COVID-19 infection, Journal of the Chinese Medical Association. 2021; 84 (1): 3-8. doi: 10.1097/JCMA.0000000000000463
5. Meyerowitz-Katz G, Bhatt S, Ratmann O, Braumer JM, Flaxman S, Mishra S, et al. Is the cure really worse than the disease? The health impacts of lockdowns during COVID-19. BMJ Global Health 2021; 6:e006653. doi:10.1136/bmjgh-2021-006653

1. Patel MD, Rosenstrom E, Ivy JS, et al. Association of simulated COVID-19 vaccination and non-pharmaceutical interventions with Infections, Hospitalizations, and Mortality. JAMANetwOpen*.* 2021; 4(6): e2110782. doi:10.1001/jamanetworkopen.2021.10782
2. Kumar C. COVID-19 Social Vaccine Toolkit (C19-SVT) 2020. doi:10.31224/osf.io/dgtj5.
3. Basu, D, Ramokgopa, G. A social vaccine for COVID-19. Southern African Journal of Public Health (incorporating Strengthening Health Systems) 2020; 4. 32. 10.7196/SHS.2020.v4i2.122.
4. Murthy RS. COVID-19 pandemic and emotional health: Social psychiatry perspective. Indian J Soc Psychiatry 2020; 36: S24-42
5. World Health Organisation (WHO), Update on Omicron, Geneva November 2021. Available at: https://www.who.int/news/item/28-11-2021-update-on-omicron Accessed on 9th December 2021

1. Oyebode O, Ndulue C, Adib A, Mulchandani D, Suruliraj B, Orji FA, et.al Health, Psychosocial, and Social Issues Emanating From the COVID-19 Pandemic Based on Social Media Comments: Text Mining and Thematic Analysis Approach. JMIR Med Inform. 2021; 9(4):e22734. doi: 10.2196/22734. PMID: 33684052; PMCID: PMC8025920.
2. Bekhuis T, Kreinacke M, Spallek H, Song M, O'Donnell JA. Using natural language processing to enable in-depth analysis of clinical messages posted to an internet mailing list: a feasibility study. J Med Internet Res 2011 ; 13(4):e98 [FREE Full text] [doi: 10.2196/jmir.1799] [Medline: 22112583]
3. Boldrini M, Canoll PD, Klein RS. How COVID-19 Affects the Brain. JAMA Psychiatry. Published online March 26, 2021. doi:10.1001/jamapsychiatry.2021.0500
4. Kase Y & Okano H. Neurological pathogenesis of SARS-CoV-2 (COVID-19): from virological features to clinical symptoms; Inflammation and Regeneration 2021; 41:15 https://doi.org/10.1186/s41232-021-00165-8
5. Taquet M,Luciano S,Geddes JR,Harrison PJ. Bidirectional associations between COVID-19 and psychiatric disorder: retrospective cohort studies of 62 354 COVID-19 cases in the USA; Lancet Psychiatry 2021; 8: 130–40.https://doi.org/10.1016/S2215-0366(20)30462-4
6. The Royal Australian College of General Practitioners. Caring for patients with post–COVID-19 conditions. East Melbourne, Vic: RACGP, 2021.
7. Pan K, Kok AAL, Eikelenboom M,et.al. The mental health impact of the COVID-19 pandemic on people with and without depressive, anxiety, or obsessive-compulsive disorders: a longitudinal study of three Dutch case-control cohorts. T Lancet Psychiatry 2021; 8: 121–29
8. UK Government (2021) COVID-19 mental health and wellbeing recovery action plan- to prevent, mitigate and respond to the mental health impacts of the pandemic during 2021 to 2022
9. Vindegaard N, Benros ME,COVID-19 pandemic and mental health consequences: Systematic review of the current evidence, Brain, Behaviour, and Immunity, 2020, 89:531-542.
10. Czeisler M É , Lane R I, Petrosky E, et al. Mental Health, Substance Use, and Suicidal Ideation During the COVID-19 Pandemic — United States, June 24–30, 2020. MMWR Morbidity Mortality Weekly Report, 2020; 69: 1049–1057. DOI: http://dx.doi.org/10.15585/mmwr.mm6932a1external icon
11. Grossman ER, Benjamin-Neelon SE, Sonnenschein S. Alcohol Consumption during the COVID-19 Pandemic: A Cross-Sectional Survey of US Adults. *Int J Environ Res Public Health*. 2020; 17(24):9189. Published 2020 Dec 9. doi:10.3390/ijerph17249189
12. Sun Y et al. Brief report: Increased addictive internet and substance use behavior during the COVID-19 pandemic in China. Am J Addict 2020 Jul; 29:268. ([https://doi.org/10.1111/ajad.13066](about:blank))
13. Fraser, Erika. “Impact of COVID-19 Pandemic on Violence against Women and Girls.” UK Department for International Development, March 16, 2020
14. Pappa S, Ntella V, Giannakas T, et.al. Prevalence of depression, anxiety, and insomnia among healthcare workers during the COVID-19 pandemic: A systematic review and meta-analysis [published correction appears in Brain Behav Immun. 2021 Feb;92:247]. Brain Behav Immun. 2020; 88: 901-907. doi:10.1016/j.bbi.2020.05.026
15. Croghan IT, Chesak SS, Adusumalli J, et.al. Stress, Resilience, and Coping of Healthcare Workers during the COVID-19 Pandemic. J Prim Care Community Health. 2021 ; 12:21501327211008448. doi: 10.1177/21501327211008448. PMID: 33834900; PMCID: PMC8040550.
16. Gogoi AJ, Sarmah C. COVID-19 and Lockdown: Impact on Mental Health among the Residents of Assam, India. Asia Pac J Public Health. 2020 Nov; 32(8):456-457. doi: 10.1177/1010539520962952. Epub 2020 Oct 1. PMID: 33000635.
17. Saladino V, Algeri D and Auriemma V. The Psychological and Social Impact of Covid-19: New Perspectives of Well-Being. Front. Psychol. 202011:577684.doi: 10.3389
18. Pieh C, O´Rourke T, Budimir S, Probst T (2020) Relationship quality and mental health during COVID-19 lockdown. PLoS ONE 15(9): e0238906. https://doi.org/10.1371/journal.pone.0238906
19. Dawel A, Shou Y, Smithson M, et.al The Effect of COVID-19 on Mental Health and Wellbeing in a Representative Sample of Australian Adults. Front. Psychiatry ,2020;11:579985.doi: 10.3389/fpsyt.2020.579985/fpsyg.2020.57768
20. Robinson J, Kengatharan N. Exploring the effect of Covid-19 on Small and Medium Enterprises: Early Evidence from Sri Lanka. Journal of Applied Economics & Business Research’2020; 10(2)115-124
21. Chandradasa M., Kuruppuarachchi K.A.L.A.Ed. Mental Health Impact of the COVID-19 Pandemic. Sri Lanka Journal of Medicine,2020 29(2): 1-4 DOI: http://doi.org/10.4038/sljm.v29i2.218
22. Hawrilenko M, Kroshus E, Tandon P, Christakis D. The Association between School Closures and Child Mental Health during COVID-19. JAMA Netw Open; 2021; 4(9):e2124092. doi:10.1001/jamanetworkopen.2021.24092
23. Jedwab R, Khan A M, Damania R, Russ J , Zaveri E D. Pandemics, poverty, and social cohesion: lessons from the past and possible scenarios for COVID-19. Mimeo 2020.
24. Cohn Jr SK. Epidemics: Hate and Compassion from the Plague of Athens to AIDS. Oxford University Press 2018.
25. Islam A, Pakrashi D, Vlassopoulos M & L Wang LC. Stigma and Misconceptions in the Time of the COVID-19 Pandemic: A Field Experiment in India, IZA DP No. 13995 2020.
26. Greenbank A &Workman MRumours of infertility caused by COVID-19 vaccination hold women back.2021.Available at: [https://www.abc.net.au/news/2021-08-15/rumours-of-infertility-hold-women-back-from-covid-vaccination/100373894](about:blank) Accessed on 22.11.2021
27. Volkmer I, Altieri E & et.al. Social media and COVID-19: A global study of digital crisis interaction among Gen Z and millennial; Wunderman Thompson, University of Melbourne, Pollfish and The WHO 2021
28. Leung J, Chung JYC, Tisdale C, Chiu V, Lim CCW, Chan G. Anxiety and Panic Buying Behaviour during COVID-19 Pandemic-A Qualitative Analysis of Toilet Paper Hoarding Contents on Twitter. Int J Environ Res Public Health. 2021 Jan 27; 18(3):1127. doi: 10.3390/ijerph18031127. PMID: 33514049; PMCID: PMC7908195.
29. Coopes, A, Reeders, D. Naming and shaming COVID-19 spreaders will drive this virus further underground, Opinion Canberra Times 2021Available at: [https://www.canberratimes.com.au/story/6858416/naming-and-shaming-covid-19-spreaders-will-drive-this-virus-further-underground/](about:blank) Accessed on:13.12.2021
30. Barua Z, Barua S, Aktar S, et.al. Effects of misinformation on COVID-19 individual responses and recommendations for resilience of disastrous consequences of misinformation, Progress in Disaster Science, 2020:8
31. Turner R. Experts unpick symbols and slogans at anti-COVID vaccination mandate protest in Perth, Australian Broadcasting Corporation (ABC) News 20 Dec 2021, available at https://www.abc.net.au/news/2021-12-20/experts-insight-into-covid-vaccine-mandate-protests/100707434
32. Taylor S. Understanding and managing pandemic-related panic buying. J Anxiety Disord. 2021; 78: 102364. doi: 10.1016/j.janxdis.2021.102364. Epub 2021 Jan 23. PMID: 33517219
33. Schmidt S, Benke C, Pané-Farré CA (2021) Purchasing under threat: Changes in shopping patterns during the COVID-19 pandemic. PLoS ONE 16(6): e0253231. https://doi.org/10.1371/journal.pone.0253231
34. Javelot H, Weiner L. Panique et pandémie : revue de la littérature sur les liens entre le trouble panique et l’épidémie à SARS-CoV-2 [Panic and pandemic: Review of the literature on the links between panic disorder and the SARS-CoV-2 epidemic]. Encephale. 2020 Jun; 46(3S):S93-S98. French. doi: 10.1016/j.encep.2020.05.010. Epub 2020 May 21. PMID: 32507556; PMCID: PMC7241353.
35. Oliu-Barton M, Pradelski BSR, Aghion P, et.al.. SARS-CoV-2 elimination, not mitigation, creates best outcomes for health, the economy, and civil liberties. Lancet. 2021 Jun 12; 397(10291):2234-2236. doi: 10.1016/S0140-6736(21)00978-8. Epub 2021 Apr 28. PMID: 33932328; PMCID: PMC8081398.
36. Thakur A. Mental Health in High School Students at the Time of COVID-19: A Student's Perspective. J Am Acad Child Adolesc Psychiatry. 2020; 59(12):1309-1310. doi:10.1016/j.jaac.2020.08.005
37. Doran, M.George Christensen likens COVID-19 restrictions to Hitler, Pol Pot regimes. ABC News. 24th November 2021.
38. Lima C. Meet the doctors' group spreading covid conspiracy theories in plain sight on Facebook. The Washington Post .20th October 2021.
39. Quay S, Muller R. GOP Medical Witnesses: COVID-19 'Exactly What You'd Expect If You'd Gone Through Gain-Of-Function'.United States Congresss. 30th June 2021.Avaialble from: [https://www.youtube.com/watch?v=YeW5sI-R1Qg](about:blank)
40. Tollefson, J. Tracking QAnon: how Trump turned conspiracy-theory research upside down. Nature. 4th Feb 2021
41. Slomski A. Thousands of US Youths Cope With the Trauma of Losing Parents to COVID-19. *JAMA.*Published online November 17, 2021. doi:10.1001/jama.2021.20846
42. Evans S, Mikocka-Walus A, Klas A, Olive L, Sciberras E, Karantzas G and Westrupp EM (2020) From “It Has Stopped Our Lives” to “Spending More Time Together Has Strengthened Bonds”: The Varied Experiences of Australian Families During COVID-19. Front. Psychol. 11:588667. doi: 10.3389/fpsyg.2020.588667
43. Children’s Health Queensland Hospital and Health Service, Mental health of one in five Australian children impacted by pandemic. Available at: [https://www.childrens.health.qld.gov.au/media-release-children-mental-health-impacted-by-pandemic/](about:blank) Accessed on 22.11.2021
44. Vaterlaus, J.M., Shaffer, T., Patten, E.V. *et al.* Parent–Child Relationships and the COVID-19 Pandemic: An Exploratory Qualitative Study with Parents in Early, Middle, and Late Adulthood. *J Adult Dev* **28,**251–263 (2021). [https://doi.org/10.1007/s10804-021-09381-5](about:blank)
45. Huber J, Woods T, Fushi A, Duong M, Eidelman A, Zalal A, et al. Social media research strategy to understand clinician and public perception of health care messages. JDR Clin Trans Res 2020 Jan;5(1):71-81 doi: 10.1177/2380084419849439] [Medline: 31067411
46. Callinan S, Smit K, Mojica-Perez Y, D'Aquino S, Moore D, Kuntsche E. Shifts in alcohol consumption during the COVID-19 pandemic: early indications from Australia. Addiction. 2021;116(6):1381-1388. doi: 10.1111/add.15275. Epub 2020 Oct 18. PMID: 33006789; PMCID: PMC7537267.
47. Yasin, Y.J., Grivna, M. & Abu-Zidan, F.M. Global impact of COVID-19 pandemic on road traffic collisions. World J Emerg Surg 16, 51 (2021). https://doi.org/10.1186/s13017-021-00395-8" [https://doi.org/10.1186/s13017-021-00395-8](about:blank)
48. Dsouza DD, Quadros S, Hyderabadwala ZJ, Mamun MA. Aggregated COVID-19 suicide incidences in India: Fear of COVID-19 infection is the prominent causative factor. Psychiatry Res. 2020 Aug; 290:113145. doi: 10.1016/j.psychres.2020.113145.
49. Lin CY, Chang SS, Shen LJ. Decrease in Suicide during the First Year of the COVID-19 Pandemic in Taiwan. J Clin Psychiatry. 2021 Nov 9; 82(6):21br14137. doi: 10.4088/JCP.21br14137. PMID: 34758211.
50. Australian Bureau of Statistics (ABS), *Causes of Death, Australia: 2020*, ABS, Canberra, 2021
51. Appleby L.What has been the effect of covid-19 on suicide rates? BMJ 2021;372:n834 doi: [https://doi.org/10.1136/bmj.n834](about:blank)
52. Samaritan, latest suicide data Available at: [https://www.samaritans.org/about-samaritans/research-policy/suicide-facts-and-figures/latest-suicide-data/](about:blank) Accessed on 16/12/20221
53. Suicide statistics 2019,2020,Sri Lanka Police Available at: [https://www.police.lk/index.php/item/138-crime-statistics](about:blank) Accessed on 17/12/2021
54. Knipe D, John A, Padmanathan P, et.al. Suicide and self-harm in low- and middle- income countries during the COVID-19 pandemic: A systematic review, BMJ (Preprint) https://doi.org/10.1101/2021.09.03.21263083
55. Seelarathna RMM, Rajeshkannan N, Kumanan T Impact of Non–Coronavirus -2019 (Non–COVID-19) Respiratory disease Hospital Admissions: A Single Centre experience. Jaffna Medical Journal Vol.33, No.1, July 2021 DOI: [http://doi.org/10.4038/jmj.v33i1.118](about:blank)
56. The Department of Health, Australian Influenza Surveillance Report and Activity Updates. Available at : https://www1.health.gov.au/internet/main/publishing.nsf/Content/cda-surveil-ozflu-flucurr.htm" https://www1.health.gov.au/internet/main/publishing.nsf/Content/cda-surveil-ozflu-flucurr.htm Accessed on 13/11/2021

1. Su W, Stone L & Blashki, Improving mental health and reducing suicide risk: how GPs can help during the COVID-19 pandemic Medicine Today 2020; 21(9): 59-65
2. The World Health Organization Quality of Life assessment (WHOQOL): position paper from the World Health Organization. Soc Sci Med. 1995; 41(10): 1403-1409. doi:10.1016/0277-9536(95)00112-K
3. Dalle Ave AL, Sulmasy DP. Health Care Professionals’ Spirituality and COVID-19: Meaning, Compassion, Relationship. *JAMA.* Published online October 08, 2021. doi:10.1001/jama.2021.16769
4. Long E, Patterson S, Maxwell K, et al. COVID-19 pandemic and its impact on social relationships and health, J Epidemiology Community Health Epub 2021;1–5 doi:10.1136/jech-2021
5. Carroll S et.al. Interventions to Mitigate COVID-19 Related mental health risks for Those with Pre-Existing Chronic Health Conditions: A Knowledge Synthesis Based on the English and Chinese Language Literature 2020. Available at: https://covid19mentalhealthresearch.ca/wp-content/uploads/2021/01/DAVISON-CMH-KS-final-knowledge-synthesis-2020-11-25.pdf
6. Harleen K, Tushar S, Yogesh Kumar A, Shalini M. Physical Fitness and Exercise During the COVID-19 Pandemic: A Qualitative Enquiry Frontiers in Psychology ,11 2020-2043, DOI=10.3389/fpsyg.2020.590172 Available at: https://www.frontiersin.org/article/10.3389/fpsyg.2020.590172

1. Fishman MDC. The Silver Linings Journal: Gratitude during a Pandemic. *J Radiol Nurs*. 2020; 39(3):149-150. doi:10.1016/j.jradnu.2020.05.005
2. Zheng, M., Bender, D. & Lyon, C. Online learning during COVID-19 produced equivalent or better student course performance as compared with pre-pandemic: empirical evidence from a school-wide comparative study. *BMC Med Educ* **21,**495 (2021). [https://doi.org/10.1186/s12909-021-02909-z](about:blank)
3. Vaterlaus JM, Shaffer, T, Patten, EV *et al.* Parent–Child Relationships and the COVID-19 Pandemic: An Exploratory Qualitative Study with Parents in Early, Middle, and Late Adulthood. *J Adult Dev* **28,**251–263 (2021). [https://doi.org/10.1007/s10804-021-09381-5](about:blank)
4. Starmer, J. South Korea is experiencing another wave of coronavirus. And once again, it has led to a clash between church and state. ABC News.4th September 2020.Available at: [https://www.abc.net.au/news/2020-09-04/why-is-south-korea-facing-another-wave-of-coronavirus-covid-19/12620746](about:blank)
5. Ellis-Peterson H, Hassan, A. Kumbh Mela: how a super spreader festival seeded Covid across India. 30th May 2021. Available at: [https://www.theguardian.com/world/2021/may/30/kumbh-mela-how-a-superspreader-festival-seeded-covid-across-india](about:blank)
6. Douglas, BB, Nina B , Zach F ,Sebastián O. The Effects of Large Group Meetings on the Spread of COVID-19: The Case of Trump Rallies (October 30, 2020). Available at SSRN: https://ssrn.com/abstract=3722299 or [http://dx.doi.org/10.2139/ssrn.3722299](about:blank)
7. Kumarasinghe, K. Sri Lanka Teaches the World How Not to Respond to COVID-19

Bungled communications and ethnic profiling have become hallmarks of Sri Lanka’s pandemic response. The Diplomet.18th May 2021.Available at: [https://thediplomat.com/2021/05/sri-lanka-teaches-the-world-how-not-to-respond-to-covid-19/](about:blank)

1. Lloyd M. Omicron variant hits South Africa, as country encounters vaccine hesitancy, conspiracy theories. ABC News.27th November 2021. Available at: [https://www.abc.net.au/news/2021-11-27/omicron-covid-variant-hits-south-africa/100646204](about:blank)
2. Wild A, Kunstler B, Goodwin D, Onyala S, et.al. Communicating COVID-19 health information to culturally and linguistically diverse communities: insights from a participatory research collaboration. Public Health Res Pract. 2021;31(1):e3112105. Available from [https://www.phrp.com.au/issues/march-2021-volume-31-issue-1/covid-19-communication-for-cald-communities/](about:blank)
3. Grills, N. & Butcher, N. Better Engaging Culturally Diverse Communities During Covid-19. Health & Wellbeing, Pursuit, University of Melbourne: Sept, 2020. available from https://pursuit.unimelb.edu.au/articles/better-engaging-culturally-diverse-communities-during-covid-19
4. Attwooll J**.** RACGP puts spotlight on pandemic experience, News GP. November 2021.Avialble at: [https://www1.racgp.org.au/newsgp/professional/it-is-vital-that-we-learn-racgp-puts-spotlight-on?utm_source=facebook&utm_medium=racgp&utm_campaign=27f94252-9b12-45b5-bdaa](about:blank)
5. Somasundaram, D. Scarred Communities- Psychosocial Impact of Man-made and Natural Disasters on Sri Lankan Society. SAGE Publications, New Delhi 2014.
6. Somasundaram, D. Using Traditional Relaxation Techniques in Health Care. Community Mental Health and Wellbeing Bulletin,2010; 3: 1, 14-30.
7. Somasundaram, D. Cultural relaxation methods for minor mental health disorders. SL J Psychiatry; 2012 3 (2) 3-6
8. Van den Broucke S. Why health promotion matters to the COVID-19 pandemic, and vice versa. Health Promote Int. 2020; 35(2):181-186. doi:10.1093/heapro/daaa042
9. McGorry P. Mental health and COVID‐19: are we really all in this together?; Med J Aust 2020; 213 (10): 454-455. doi: 10.5694/mja2.50834
10. Kishi R, Pavlik M, Bynum E, Miller A, Goos C, Satre J, Jones S. ACLED 2020: The Year In Review, March 2021 Available at: https://reliefweb.int/sites/reliefweb.int/files/resources/ACLED_Annual-Report-2020_Web_March2021.pdf accessed on 20/11/2021
11. Juno J, Wheatley A. Are new COVID variants like Omicron linked to low vaccine coverage? Here’s what the science says, The Conversation, November 29, 2021. Available from: <https://theconversation.cmail19.com/t/r-l-triuhlut-oihdjuyihj-i/>
12. Bavel JJV, Baicker K, Boggio PS,  *et al.* Using social and behavioural science to support COVID-19 pandemic response. *Nat Hum Behav* 2020; 4:460–471. https://doi.org/10.1038/s41562-020-0884-z
